# Supplementary material for: Serum CXCL9 as a potential marker of Type 1 inflammation in the context of eosinophilic asthma
Source: PubMed Central journal article supplement (PMC6972734; doi:10.1111/all.13924), 2019-06-17

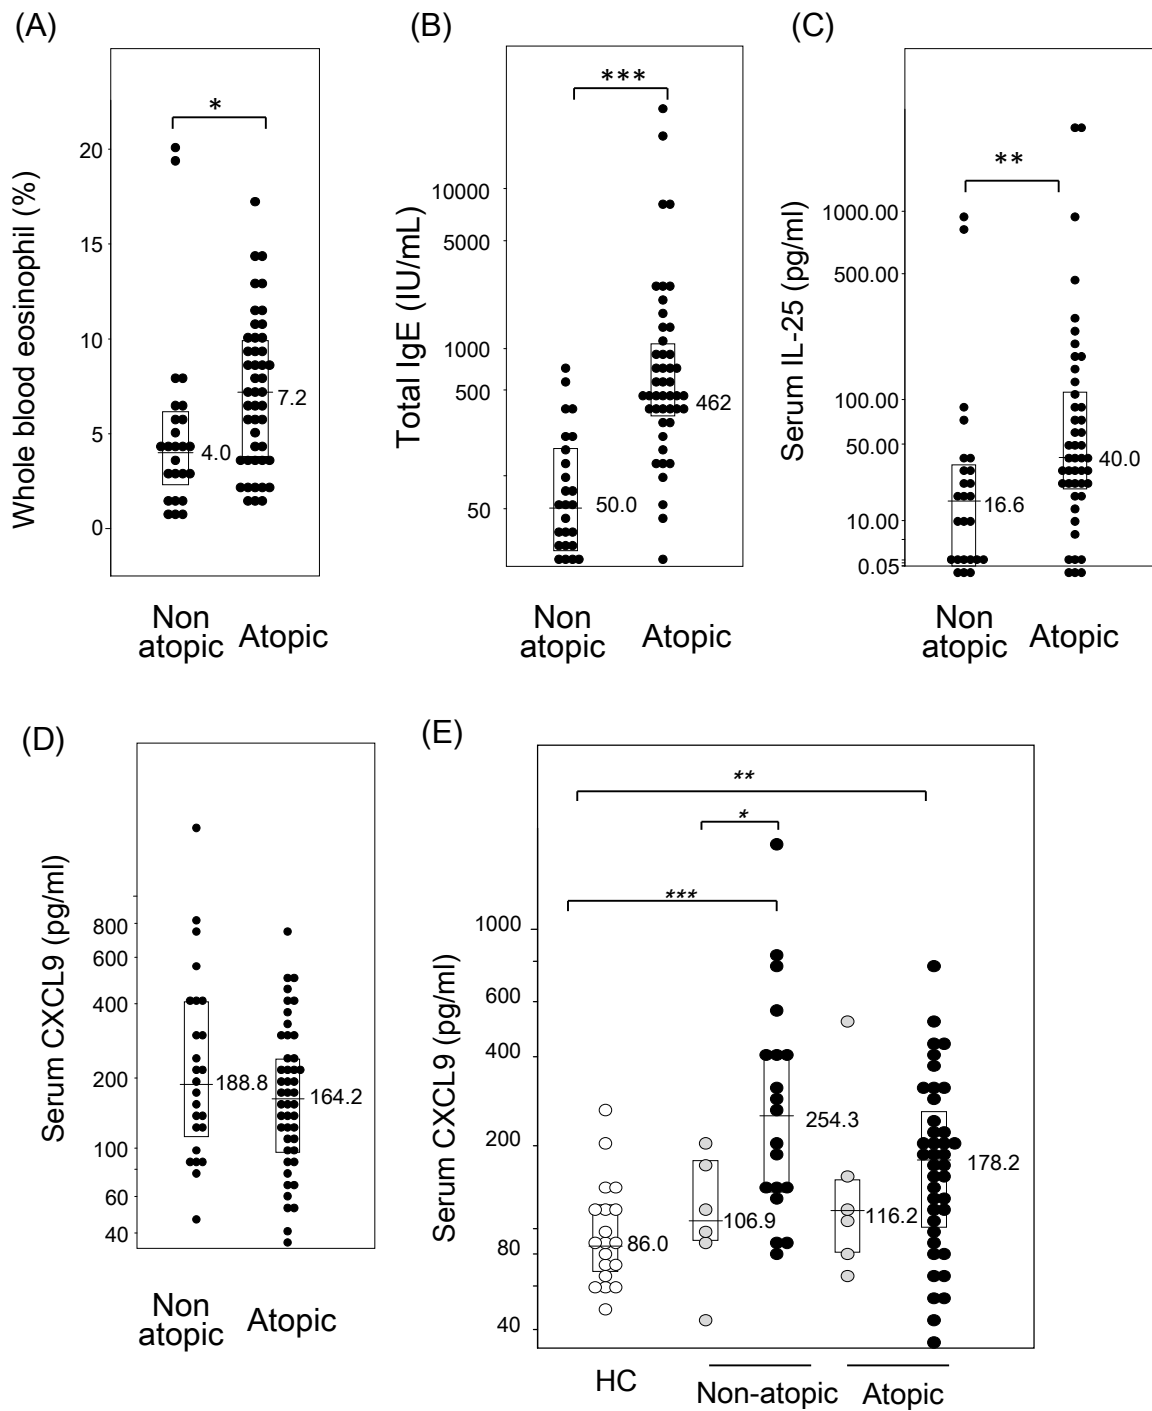

Supplement: ALL-74-2515-s002.pdf [file ALL-74-2515-s002.pdf]
