# Supplementary material for: Serum CXCL9 as a potential marker of Type 1 inflammation in the context of eosinophilic asthma
Source: PubMed Central journal article supplement (PMC6972734; doi:10.1111/all.13924), 2019-06-17
Supplement: ALL-74-2515-s003.pdf [file ALL-74-2515-s003.pdf]

Hasegawa et al. Serum CXCL9 is a T1 inflammation marker in asthma

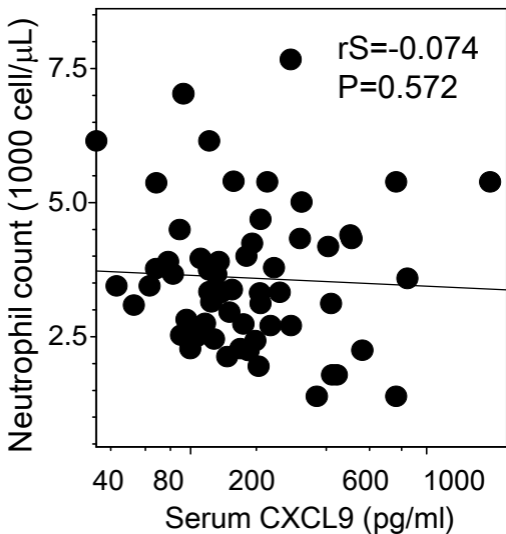

FIG.S-3
